# Supplementary material
Source: Research Square preprint supplement (doi:10.21203/rs.3.rs-9191032/v1)
Supplement: Supplementary file 1 [file 3d13b13fe85c11efc3b1613f.docx]

**Supplementary Table 1.** Patient demographics and baseline characteristics

| Characteristics | | n | (%) |
| --- | --- | --- | --- |
| All | | 50 | (100) |
| Age, median (range) | | 63.5 | (39–81) |
| Sex, male/female | | 42/8 | (84/16) |
| ECOG PS | |  |  |
| 0/1 | | 20/30 | (40/60) |
| Disease, stage | |  |  |
| SCLC/Others | | 42/8 | (84/16) |
| Dose (mg/m2) | |  |  |
| 40/35 | | 46/4 | (92/8) |
| Prior Chemotherapy | |  |  |
| 1/others (regimen) | | 35/15 | (70/30) |
| Prior Radiotherapy | |  |  |
| yes, thoracic/not | | 11/39 | (22/78) |
| Prior Surgery | |  |  |
| yes, primary/not | | 9/41 | (18/82) |
| Pretreatment laboratory data | |  |  |
| BSA, | m2 | 1.65 | (1.21–1.97) |
| BW, | kg | 59.2 | (34.9–80.3) |
| HGT, | cm | 166.1 | (145.4–179.4) |
| ALB, | g/dL | 4.0 | (2.5–4.9) |
| ALT, | IU/L | 18 | (7–152) |
| AST, | IU/L | 24 | (11–155) |
| SCr, | mg/dL | 0.8 | (0.3–1.5) |
| T-Bil, | g/dL | 0.5 | (0.4–1.5) |
| ANC, | ×103 cells/mm3 | 3.7 | (1.4–11.9) |
| Hgb, | g/dL | 11.6 | (7.2–16.3) |
| PLT, | cells/mm3 | 22.1 | (9.3–43.9) |

Abbreviations:

ECOG PS, Eastern Cooperative Oncology Group performance status; SCLC, small cell lung cancer; BSA, body surface area; BW, body weight; HGT, height; ALB, serum albumin; ALT, alanine aminotransferase; AST, aspartate aminotransferase; SCr, serum creatinine; T-Bil, total bilirubin; ANC, absolute neutrophil count; Hgb, hemoglobin; PLT, platelet count.
